# Supplementary material for: Photosynthesis Performance at Different Growth Stages, Growth, and Yield of Rice in Saline Fields
Source: MDPI journal article supplement (doi:10.3390/plants12091903), 2023-05-07
Supplement: s1 [file s1]

**Supplementary Table S1.** Environmental conditions near the rice fields including monthly total rainfall, rainy day number, mean relative humidity (RH), minimum temperature (T<sub>min</sub>) and maximum temperature (T<sub>max</sub>) during January to December 2021 recorded by Upper Northeastern Meteorological Center, Mueang Khon Kaen District, Khon Kaen, Thailand. The electrical conductivity (EC) of soil and water of the rice fields including non-saline, semi-saline and heavy saline were measured during July to Nov 2021 (gray area).

| Month     | Total of rainfall<br>(mm) | Rainy day number<br>(day) | RH<br>(%)   | T <sub>min</sub><br>(°C) | T <sub>max</sub><br>(°C) | Electrical conductivity (dS m <sup>-1</sup> ) in the fields |             |               |             |             |              |
|-----------|---------------------------|---------------------------|-------------|--------------------------|--------------------------|-------------------------------------------------------------|-------------|---------------|-------------|-------------|--------------|
|           |                           |                           |             |                          |                          | Soil                                                        |             |               | Water       |             |              |
|           |                           |                           |             |                          |                          | Non-saline                                                  | Semi-saline | Heavy-saline  | Non-saline  | Semi-saline | Heavy-saline |
| January   | 0.0                       | 0                         | 58.64 ± 4.2 | 15.81 ± 3.0              | 28.86 ± 3.0              | —                                                           | —           | —             | —           | —           | —            |
| February  | 21.4                      | 2                         | 58.46 ± 8.5 | 19.01 ± 1.6              | 31.92 ± 3.3              | —                                                           | —           | —             | —           | —           | —            |
| March     | 92.3                      | 6                         | 66.48 ± 7.6 | 23.73 ± 1.9              | 34.61 ± 2.9              | 0.86 ± 0.11                                                 | 13.45 ± 5.8 | 45.27 ± 13.07 | —           | —           | —            |
| April     | 135.8                     | 9                         | 71.06 ± 9.1 | 24.87 ± 1.3              | 34.57 ± 3.2              | —                                                           | —           | —             | —           | —           | —            |
| May       | 75.9                      | 11                        | 72.58 ± 7.0 | 25.69 ± 1.1              | 35.52 ± 2.0              | 0.12 ± 0.01                                                 | 2.87 ± 0.02 | 2.53 ± 0.01   | —           | —           | —            |
| June      | 142.3                     | 13                        | 74.06 ± 9.1 | 25.47 ± 1.2              | 34.48 ± 2.9              | —                                                           | —           | —             | —           | —           | —            |
| July      | 114.8                     | 15                        | 78.16 ± 8.4 | 25.08 ± 1.0              | 33.40 ± 2.4              | 0.06 ± 0.01                                                 | 1.08 ± 0.09 | 1.12 ± 0.01   | 0.06 ± 0.01 | 2.26 ± 0.22 | 2.97 ± 0.11  |
| August    | 141.7                     | 17                        | 78.19 ± 7.1 | 25.04 ± 1.0              | 33.80 ± 1.8              | 0.04 ± 0.01                                                 | 1.21 ± 0.14 | 1.32 ± 0.40   | 0.21 ± 0.25 | 1.78 ± 0.07 | 2.07 ± 0.05  |
| September | 271.5                     | 23                        | 86.83 ± 4.5 | 24.21 ± 0.8              | 31.58 ± 1.7              | 0.04 ± 0.03                                                 | 1.05 ± 0.16 | 1.33 ± 0.29   | 0.06 ± 0.01 | 1.31 ± 0.28 | 1.48 ± 0.17  |
| October   | 136.7                     | 14                        | 81.22 ± 5.5 | 23.44 ± 1.6              | 31.30 ± 2.2              | 0.48 ± 0.31                                                 | 2.86 ± 1.58 | 4.11 ± 1.95   | dry         | dry         | dry          |
| November  | 0.0                       | 0                         | 69.93 ± 5.4 | 21.40 ± 2.0              | 31.37 ± 1.6              | 0.87 ± 0.14                                                 | 4.05 ± 1.22 | 4.47 ± 1.51   | dry         | dry         | dry          |
| December  | 0.0                       | 0                         | 60.41 ± 5.0 | 17.78 ± 2.0              | 29.40 ± 1.5              | —                                                           | —           | —             | —           | —           | —            |

**Supplementary Table S2.** SPAD values and photosynthetic parameters including net photosynthesis (P<sub>n</sub>), stomatal conductance (g<sub>s</sub>), transpiration rate (T<sub>r</sub>), water use efficiency (WUE), effective quantum yield of PSII photochemistry (Φ PSII), maximum quantum yield efficiency of PSII (F<sub>v</sub>/F<sub>m</sub>') and electron transport rate (ETR) of five rice genotypes including Pokkali, RD73, CSSL8-94, TSKC1-144 and KDML105 growing under non-saline, semi-saline and heavy-saline field. The data were measured at six rice growth stages including early vegetative, stem elongation, early booting, flowering, milky and mature. Means which are significantly different (*p* < 0.05 and *p* < 0.01) among genotypes for each saline field and field across genotypes are denoted by different lower-case letters. For each genotype means which are significantly different (*p* < 0.05) among growth stage are denoted with capital letters. Data shows mean of four replicates ± standard error (SE).

| Parameter  | Saline field | Rice genotype                         | Early vegetative | Stem elongation  | Early booting     | Flowering         | Milky           | Mature           | <sup>2</sup> Critical-<br><i>p</i> value |
|------------|--------------|---------------------------------------|------------------|------------------|-------------------|-------------------|-----------------|------------------|------------------------------------------|
| SPAD value | Non-saline   | Pokkali                               | 31.40 ± 0.60 bB  | 36.42 ± 0.33 bA  | 36.90 ± 0.48 A    | 36.55 ± 0.65 A    | 36.30 ± 0.80 bA | 27.55 ± 1.27 bC  | <i>p</i> < 0.01                          |
|            |              | RD73                                  | 34.47 ± 0.61 aDE | 38.45 ± 0.57 aBC | 36.32 ± 0.85 CD   | 41.00 ± 1.75 AB   | 42.20 ± 0.75 aA | 32.30 ± 0.90 aE  | <i>p</i> < 0.01                          |
|            |              | CSSL8-94                              | 34.47 ± 0.40 aC  | 37.25 ± 0.29 abB | 36.02 ± 0.39 BC   | 40.77 ± 1.34 A    | 41.35 ± 1.01 aA | 30.52 ± 0.26 abD | <i>p</i> < 0.01                          |
|            |              | TSKC1-144                             | 33.30 ± 0.33 abB | 38.07 ± 0.41 aA  | 34.72 ± 1.12 B    | 40.40 ± 1.11 A    | 33.80 ± 1.06 cB | 28.45 ± 0.65 bC  | <i>p</i> < 0.01                          |
|            |              | KDML105                               | 34.22 ± 0.58 aCD | 37.47 ± 0.42 abB | 35.07 ± 0.60 C    | 39.76 ± 0.25 A    | 41.56 ± 0.64 aA | 32.75 ± 1.25 aD  | <i>p</i> < 0.01                          |
|            |              | <sup>1</sup> Critical- <i>p</i> value | <i>p</i> < 0.01  | <i>p</i> < 0.05  | ns                | ns                | <i>p</i> < 0.01 | <i>p</i> < 0.01  |                                          |
|            |              | mean                                  | 33.57 ± 0.34 cD  | 37.53 ± 0.23 bB  | 35.81 ± 0.35 bC   | 39.69 ± 0.59 bA   | 39.04 ± 0.85 bA | 30.31 ± 0.60 cE  | <i>p</i> < 0.01                          |
|            | Semi-saline  | Pokkali                               | 43.80 ± 1.13 A   | 42.22 ± 1.05 AB  | 39.92 ± 0.76 bB   | 42.30 ± 0.76 bcAB | 43.45 ± 1.45 A  | 33.22 ± 2.32 C   | <i>p</i> < 0.01                          |
|            |              | RD73                                  | 43.57 ± 0.90     | 40.50 ± 2.41     | 46.62 ± 1.90 a    | 48.65 ± 1.83 a    | 48.42 ± 1.89    | 43.37 ± 3.11     | ns                                       |
|            |              | CSSL8-94                              | 43.10 ± 1.16 A   | 37.70 ± 1.48 C   | 42.60 ± 1.69 abAB | 41.60 ± 0.97 cABC | 45.30 ± 1.07 A  | 38.85 ± 2.18 BC  | <i>p</i> < 0.05                          |
|            |              | TSKC1-144                             | 45.82 ± 1.69     | 39.75 ± 0.85     | 40.22 ± 1.87 b    | 42.65 ± 1.96 bc   | 43.37 ± 1.65    | 37.75 ± 2.37     | ns                                       |
|            |              | KDML105                               | 44.20 ± 0.74 A   | 39.27 ± 1.80 B   | 46.27 ± 1.01 aA   | 46.87 ± 1.19 abA  | 47.42 ± 1.18 A  | 37.05 ± 3.06 B   | <i>p</i> < 0.01                          |

| Parameter                             | Saline field                          | Rice genotype                         | Early vegetative        | Stem elongation        | Early booting          | Flowering               | Milky                  | Mature                  | <sup>2</sup> Critical-<br><i>p</i><br>value |
|---------------------------------------|---------------------------------------|---------------------------------------|-------------------------|------------------------|------------------------|-------------------------|------------------------|-------------------------|---------------------------------------------|
|                                       |                                       | <sup>1</sup> Critical- <i>p</i> value | ns                      | ns                     | <i>p</i> < 0.05        | <i>p</i> < 0.05         | ns                     | ns                      |                                             |
|                                       |                                       | mean                                  | 44.10 ± 0.51 aAB        | 39.89 ± 0.73 aC        | 43.13 ± 0.89 aB        | 44.41 ± 0.86 aAB        | 45.59 ± 0.75 aA        | 38.05 ± 1.29 aC         | <i>p</i> < 0.01                             |
| P <sub>n</sub>                        | Heavy-saline                          | Pokkali                               | 40.85 ± 1.55 B          | 46.46 ± 1.28 aA        | 39.87 ± 1.24 B         | 40.52 ± 1.04 bB         | 47.52 ± 0.35 aA        | 28.40 ± 1.23 bC         | <i>p</i> < 0.01                             |
|                                       |                                       | RD73                                  | 41.60 ± 1.27 B          | 40.57 ± 1.04 bB        | 44.02 ± 1.95AB         | 45.45 ± 0.20 aA         | 47.20 ± 2.31 aA        | 33.60 ± 1.91 abC        | <i>p</i> < 0.01                             |
|                                       |                                       | CSSL8-94                              | 42.65 ± 0.56 AB         | 37.87 ± 1.72 bC        | 41.65 ± 1.51 ABC       | 44.67 ± 1.61 aA         | 43.72 ± 0.63 abA       | 38.92 ± 1.91 aBC        | <i>p</i> < 0.05                             |
|                                       |                                       | TSKC1-144                             | 41.42 ± 1.47 AB         | 37.42 ± 0.41 bBC       | 43.35 ± 2.28 A         | 39.30 ± 1.56 bAB        | 40.50 ± 1.40 bAB       | 33.07 ± 2.89 bC         | <i>p</i> < 0.05                             |
|                                       |                                       | KDML105                               | 41.80 ± 0.88 B          | 40.90 ± 0.73 bB        | 43.50 ± 0.83 AB        | 46.02 ± 1.07 aA         | 45.45 ± 0.66 aA        | 32.10 ± 1.86 bC         | <i>p</i> < 0.01                             |
|                                       |                                       | <sup>1</sup> Critical- <i>p</i> value | ns                      | <i>p</i> < 0.01        | ns                     | <i>p</i> < 0.01         | <i>p</i> < 0.01        | <i>p</i> < 0.05         |                                             |
|                                       |                                       | mean                                  | 41.66 ± 0.50 bBC        | 40.64 ± 0.87 aC        | 42.48 ± 0.74 aBC       | 43.19 ± 0.79 aAB        | 44.88 ± 0.78 aA        | 33.22 ± 1.12 bD         | <i>p</i> < 0.01                             |
|                                       | <sup>3</sup> Critical- <i>p</i> value | <i>p</i> < 0.01                       | <i>p</i> < 0.01         | <i>p</i> < 0.01        | <i>p</i> < 0.01        | <i>p</i> < 0.01         | <i>p</i> < 0.01        |                         |                                             |
|                                       | Non-saline                            | Pokkali                               | 23.13 ± 0.64 A          | 23.84 ± 0.79 A         | 22.26 ± 1.41 bA        | 19.40 ± 0.55 bB         | 18.29 ± 0.43 cB        | 13.33 ± 0.54 C          | <i>p</i> < 0.01                             |
|                                       |                                       | RD73                                  | 23.29 ± 1.25 B          | 25.58 ± 1.22 AB        | 27.98 ± 1.07 aA        | 26.58 ± 0.82 aA         | 25.63 ± 0.54 aAB       | 13.90 ± 1.09 C          | <i>p</i> < 0.01                             |
|                                       |                                       | CSSL8-94                              | 24.21 ± 0.38 A          | 24.44 ± 1.56 A         | 27.45 ± 1.23 aA        | 24.86 ± 0.50 aAB        | 23.03 ± 0.82 bA        | 15.13 ± 0.97 C          | <i>p</i> < 0.01                             |
|                                       |                                       | TSKC1-144                             | 22.98 ± 0.86 B          | 23.98 ± 0.88 AB        | 24.58 ± 1.14 abAB      | 27.06 ± 0.96 aA         | 26.07 ± 1.33 aAB       | 14.45 ± 1.36 C          | <i>p</i> < 0.01                             |
|                                       |                                       | KDML105                               | 22.82 ± 1.11 B          | 24.98 ± 0.62 AB        | 26.65 ± 1.59 aA        | 26.18 ± 1.50 aA         | 25.72 ± 1.12 aA        | 13.59 ± 0.54 C          | <i>p</i> < 0.01                             |
| <sup>1</sup> Critical- <i>p</i> value |                                       | ns                                    | ns                      | <i>p</i> < 0.05        | <i>p</i> < 0.01        | <i>p</i> < 0.01         | ns                     |                         |                                             |
| mean                                  |                                       | 23.29 ± 0.38 bC                       | 24.57 ± 0.45 ABC        | 25.79 ± 0.71 aA        | 24.81 ± 0.74 aAB       | 23.75 ± 0.77 aBC        | 14.08 ± 0.41 bD        | <i>p</i> < 0.01         |                                             |
| P <sub>s</sub>                        | Semi-saline                           | Pokkali                               | 27.54 ± 0.52 abA (+19%) | 24.56 ± 1.47 AB (+3%)  | 23.97 ± 0.67 B (+8%)   | 22.77 ± 0.86 BC (+17%)  | 20.82 ± 1.41 CD (+14%) | 17.96 ± 0.53 aD (+35%)  | <i>p</i> < 0.01                             |
|                                       |                                       | RD73                                  | 28.89 ± 0.42 aA (+24%)  | 25.25 ± 1.16 B (-1%)   | 21.22 ± 0.38 C (-24%)  | 23.63 ± 0.97 BC (-11%)  | 24.98 ± 1.37 B (-3%)   | 17.53 ± 1.86 aD (+26%)  | <i>p</i> < 0.01                             |
|                                       |                                       | CSSL8-94                              | 25.85 ± 0.61 bA (+7%)   | 25.82 ± 0.65 A (+6%)   | 21.41 ± 1.19 B (-22%)  | 22.66 ± 0.60 B (-9%)    | 23.69 ± 1.15 AB (+3%)  | 15.90 ± 0.85 abC (+5%)  | <i>p</i> < 0.01                             |
|                                       |                                       | TSKC1-144                             | 28.92 ± 0.86 aA (+26%)  | 25.95 ± 0.95 AB (+8%)  | 22.48 ± 1.12 CD (-9%)  | 21.69 ± 1.20 D (-20%)   | 25.61 ± 0.53 BC (-2%)  | 12.88 ± 1.23 bE (-11%)  | <i>p</i> < 0.01                             |
|                                       |                                       | KDML105                               | 29.39 ± 0.32 aA (+29%)  | 25.41 ± 1.17 BC (+2%)  | 20.68 ± 0.46 D (-22%)  | 22.26 ± 0.64 CD (-15%)  | 25.65 ± 2.15 B (0%)    | 15.47 ± 0.21 abE (+14%) | <i>p</i> < 0.01                             |
|                                       |                                       | <sup>1</sup> Critical- <i>p</i> value | <i>p</i> < 0.01         | ns                     | ns                     | ns                      | ns                     | <i>p</i> < 0.05         |                                             |
|                                       |                                       | mean                                  | 28.12 ± 0.37 aA         | 25.40 ± 0.46 B         | 21.95 ± 0.43 bC        | 22.60 ± 0.38 bC         | 24.15 ± 0.70 aB        | 15.95 ± 0.60 aD         | <i>p</i> < 0.01                             |
|                                       | Heavy-saline                          | Pokkali                               | 25.93 ± 1.05 cAB (+12%) | 22.83 ± 1.54 BC (-4%)  | 26.01 ± 1.28 A (+16%)  | 23.09 ± 0.99 ABC (+19%) | 20.36 ± 1.15 C (+11%)  | 12.55 ± 0.96 D (-6%)    | <i>p</i> < 0.01                             |
|                                       |                                       | RD73                                  | 30.98 ± 0.68 abA (+33%) | 28.86 ± 1.53 AB (+13%) | 24.82 ± 0.82 BC (-11%) | 23.37 ± 0.34 BC (-12%)  | 19.15 ± 3.46 C (-25%)  | 12.08 ± 2.42 D (-13%)   | <i>p</i> < 0.01                             |
|                                       |                                       | CSSL8-94                              | 31.64 ± 1.20 aA (+31%)  | 26.63 ± 1.16 B (+9%)   | 24.37 ± 1.20 B (-11%)  | 24.90 ± 0.64 B (0%)     | 23.04 ± 2.08 B (0%)    | 11.06 ± 2.01 C (-27%)   | <i>p</i> < 0.01                             |
|                                       |                                       | TSKC1-144                             | 26.43 ± 0.91 cA (+15%)  | 25.00 ± 1.04 A (+4%)   | 23.22 ± 0.80 A (-6%)   | 24.37 ± 0.47 A (-10%)   | 17.12 ± 1.57 B (-34%)  | 9.04 ± 1.54 C (-37%)    | <i>p</i> < 0.01                             |
|                                       |                                       | KDML105                               | 28.28 ± 1.20 bcA (+29%) | 26.21 ± 2.08 AB (+5%)  | 25.51 ± 1.44 AB (-4%)  | 26.74 ± 1.41 AB (+2%)   | 22.94 ± 0.74 B (-11%)  | 10.89 ± 1.06 C (-20%)   | <i>p</i> < 0.01                             |
|                                       |                                       | <sup>1</sup> Critical- <i>p</i> value | <i>p</i> < 0.01         | ns                     | ns                     | ns                      | ns                     | ns                      |                                             |
| mean                                  |                                       | 28.65 ± 0.67 aA                       | 25.91 ± 0.75 B          | 24.79 ± 0.50 aB        | 24.49 ± 0.45 aB        | 20.52 ± 0.96 bC         | 11.12 ± 0.73 cD        | <i>p</i> < 0.01         |                                             |
| <sup>3</sup> Critical- <i>p</i> value | <i>p</i> < 0.01                       | ns                                    | <i>p</i> < 0.01         | <i>p</i> < 0.05        | <i>p</i> < 0.01        | <i>p</i> < 0.01         |                        |                         |                                             |
| g <sub>s</sub>                        | Non-saline                            | Pokkali                               | 0.15 ± 0.01 aC          | 0.57 ± 0.05 A          | 0.45 ± 0.04 cB         | 0.39 ± 0.03 B           | 0.41 ± 0.04 abB        | 0.14 ± 0.01 C           | <i>p</i> < 0.01                             |
|                                       |                                       | RD73                                  | 0.11 ± 0.01 abC         | 0.54 ± 0.02 AB         | 0.56 ± 0.04 abA        | 0.55 ± 0.03 AB          | 0.48 ± 0.03 aB         | 0.16 ± 0.02 C           | <i>p</i> < 0.01                             |
|                                       |                                       | CSSL8-94                              | 0.09 ± 0.01 bC          | 0.52 ± 0.03 A          | 0.52 ± 0.03 abcA       | 0.40 ± 0.08 B           | 0.28 ± 0.04 cB         | 0.16 ± 0.01 C           | <i>p</i> < 0.01                             |
|                                       |                                       | TSKC1-144                             | 0.12 ± 0.02 abC         | 0.48 ± 0.03 A          | 0.48 ± 0.02 bcA        | 0.41 ± 0.05 A           | 0.29 ± 0.03 cD         | 0.14 ± 0.03 C           | <i>p</i> < 0.01                             |
|                                       |                                       | KDML105                               | 0.11 ± 0.02 abD         | 0.54 ± 0.03 AB         | 0.58 ± 0.02 aA         | 0.48 ± 0.07 B           | 0.37 ± 0.03 bcC        | 0.14 ± 0.02 D           | <i>p</i> < 0.01                             |
|                                       |                                       | <sup>1</sup> Critical- <i>p</i> value | <i>p</i> < 0.05         | ns                     | <i>p</i> < 0.05        | ns                      | <i>p</i> < 0.01        | ns                      |                                             |
|                                       |                                       | mean                                  | 0.12 ± 0.01 bD          | 0.53 ± 0.01 aA         | 0.52 ± 0.02 aA         | 0.44 ± 0.03 B           | 0.37 ± 0.02 aC         | 0.15 ± 0.01 aD          | <i>p</i> < 0.01                             |
|                                       | Semi-saline                           | Pokkali                               | 0.49 ± 0.01 A           | 0.16 ± 0.01 C          | 0.14 ± 0.02 bC         | 0.34 ± 0.11 AB          | 0.49 ± 0.03 A          | 0.18 ± 0.03 BC          | <i>p</i> < 0.01                             |
|                                       |                                       | RD73                                  | 0.50 ± 0.03 AB          | 0.16 ± 0.02 C          | 0.51 ± 0.03 aAB        | 0.56 ± 0.01 A           | 0.44 ± 0.02 B          | 0.19 ± 0.04 C           | <i>p</i> < 0.01                             |
|                                       |                                       | CSSL8-94                              | 0.41 ± 0.02 BC          | 0.17 ± 0.01 D          | 0.52 ± 0.01 aA         | 0.49 ± 0.01 AB          | 0.38 ± 0.06 C          | 0.17 ± 0.01 D           | <i>p</i> < 0.01                             |

| Parameter      | Saline field | Rice genotype                         | Early vegetative | Stem elongation  | Early booting   | Flowering       | Milky            | Mature           | <sup>2</sup> Critical-<br><i>p</i> value |
|----------------|--------------|---------------------------------------|------------------|------------------|-----------------|-----------------|------------------|------------------|------------------------------------------|
|                |              |                                       |                  |                  |                 |                 |                  |                  | <i>p</i> value                           |
| T <sub>r</sub> | Heavy-saline | TSKC1-144                             | 0.48 ± 0.05 A    | 0.14 ± 0.01 C    | 0.52 ± 0.06 aA  | 0.49 ± 0.03 A   | 0.31 ± 0.03 B    | 0.10 ± 0.01 C    | <i>p</i> < 0.01                          |
|                |              | KDML105                               | 0.50 ± 0.04 A    | 0.16 ± 0.01 C    | 0.49 ± 0.01 aAB | 0.46 ± 0.05 AB  | 0.38 ± 0.07 B    | 0.12 ± 0.01 C    | <i>p</i> < 0.01                          |
|                |              | <sup>1</sup> Critical- <i>p</i> value | ns               | ns               | <i>p</i> < 0.01 | ns              | ns               | ns               |                                          |
|                |              | mean                                  | 0.48 ± 0.02 aA   | 0.16 ± 0.01 bC   | 0.44 ± 0.04 bAB | 0.47 ± 0.03 A   | 0.40 ± 0.02 aB   | 0.15 ± 0.01 aC   | <i>p</i> < 0.01                          |
|                |              | Pokkali                               | 0.39 ± 0.09 A    | 0.10 ± 0.01 cB   | 0.11 ± 0.01 cB  | 0.27 ± 0.10 bAB | 0.42 ± 0.04 abA  | 0.12 ± 0.02 B    | <i>p</i> < 0.01                          |
|                |              | RD73                                  | 0.53 ± 0.07 A    | 0.13 ± 0.01 aBC  | 0.47 ± 0.02 abA | 0.45 ± 0.02 aA  | 0.23 ± 0.06 abB  | 0.10 ± 0.02 C    | <i>p</i> < 0.01                          |
|                |              | CSSL8-94                              | 0.62 ± 0.01 A    | 0.12 ± 0.01 abD  | 0.50 ± 0.04 aB  | 0.49 ± 0.02 aB  | 0.30 ± 0.06 aC   | 0.11 ± 0.02 D    | <i>p</i> < 0.01                          |
|                |              | TSKC1-144                             | 0.38 ± 0.04 B    | 0.11 ± 0.01 bcCD | 0.41 ± 0.01 bAB | 0.43 ± 0.02 aA  | 0.15 ± 0.01 bB   | 0.08 ± 0.02 C    | <i>p</i> < 0.01                          |
|                |              | KDML105                               | 0.45 ± 0.07 A    | 0.12 ± 0.01 abC  | 0.48 ± 0.03 aA  | 0.49 ± 0.02 aA  | 0.27 ± 0.02 aB   | 0.10 ± 0.02 C    | <i>p</i> < 0.01                          |
|                |              | <sup>1</sup> Critical- <i>p</i> value | ns               | <i>p</i> < 0.05  | <i>p</i> < 0.01 | <i>p</i> < 0.05 | <i>p</i> < 0.01  | ns               |                                          |
|                |              | mean                                  | 0.47 ± 0.03 aA   | 0.12 ± 0.01 cD   | 0.39 ± 0.03 bB  | 0.43 ± 0.03 AB  | 0.28 ± 0.03 bC   | 0.10 ± 0.01 bD   | <i>p</i> < 0.01                          |
|                |              | <sup>3</sup> Critical- <i>p</i> value | <i>p</i> < 0.01  | <i>p</i> < 0.01  | <i>p</i> < 0.05 | ns              | <i>p</i> < 0.01  | <i>p</i> < 0.01  |                                          |
|                | Non-saline   | Pokkali                               | 6.69 ± 0.50 aBC  | 10.41 ± 0.27 A   | 7.13 ± 0.37 B   | 5.72 ± 0.55 CD  | 5.06 ± 0.27 cD   | 3.35 ± 0.23 aE   | <i>p</i> < 0.01                          |
|                |              | RD73                                  | 4.70 ± 0.20 bC   | 10.28 ± 0.42 A   | 8.01 ± 0.51 B   | 7.65 ± 0.56 B   | 7.37 ± 0.35 aB   | 7.00 ± 0.52 bB   | <i>p</i> < 0.01                          |
|                |              | CSSL8-94                              | 4.31 ± 0.37 bD   | 10.36 ± 0.56 A   | 7.51 ± 0.39 B   | 6.72 ± 0.70 BC  | 5.65 ± 0.55 bcCD | 7.08 ± 0.51 bBC  | <i>p</i> < 0.01                          |
|                |              | TSKC1-144                             | 5.07 ± 0.79 abBC | 9.12 ± 0.50 A    | 7.21 ± 0.14 B   | 6.68 ± 0.51 BC  | 5.58 ± 0.52 bcC  | 6.34 ± 0.94 bBC  | <i>p</i> < 0.01                          |
|                |              | KDML105                               | 4.64 ± 0.70 bD   | 10.63 ± 0.30 A   | 8.67 ± 0.08 B   | 7.77 ± 0.63 BC  | 6.64 ± 0.23 abC  | 6.46 ± 0.61 bC   | <i>p</i> < 0.01                          |
|                |              | <sup>1</sup> Critical- <i>p</i> value | <i>p</i> < 0.01  | ns               | <i>p</i> < 0.05 | ns              | <i>p</i> < 0.01  | <i>p</i> < 0.01  |                                          |
| T <sub>r</sub> | Semi-saline  | mean                                  | 5.24 ± 0.27 bE   | 10.16 ± 0.21 aA  | 7.71 ± 0.19 aB  | 6.91 ± 0.29 aC  | 6.06 ± 0.25 D    | 6.05 ± 0.40 aD   | <i>p</i> < 0.05                          |
|                |              | Pokkali                               | 8.79 ± 0.31 A    | 4.48 ± 0.26 C    | 4.02 ± 0.31 bC  | 5.50 ± 0.85 BC  | 6.40 ± 0.33 B    | 4.90 ± 0.88 cBC  | <i>p</i> < 0.01                          |
|                |              | RD73                                  | 9.19 ± 0.22 A    | 4.64 ± 0.52 C    | 6.63 ± 0.10 aB  | 6.95 ± 0.15 B   | 7.02 ± 0.24 B    | 7.83 ± 1.16 aC   | <i>p</i> < 0.01                          |
|                |              | CSSL8-94                              | 8.09 ± 0.21 A    | 4.58 ± 0.19 C    | 6.63 ± 0.16 aB  | 6.56 ± 0.07 B   | 6.30 ± 0.67 B    | 7.18 ± 0.43 abAB | <i>p</i> < 0.01                          |
|                |              | TSKC1-144                             | 9.07 ± 0.54 A    | 4.01 ± 0.20 D    | 6.66 ± 0.27 aB  | 6.58 ± 0.20 B   | 5.81 ± 0.31 BC   | 4.75 ± 0.52 cCD  | <i>p</i> < 0.01                          |
|                |              | KDML105                               | 9.27 ± 0.19 A    | 4.82 ± 0.46 C    | 6.62 ± 0.13 aB  | 6.25 ± 0.31 B   | 6.30 ± 0.66 B    | 5.76 ± 0.25 bcBC | <i>p</i> < 0.01                          |
|                |              | <sup>1</sup> Critical- <i>p</i> value | ns               | ns               | <i>p</i> < 0.01 | ns              | ns               | <i>p</i> < 0.05  |                                          |
|                |              | mean                                  | 8.88 ± 0.16 aA   | 4.51 ± 0.15 bC   | 6.11 ± 0.25 bB  | 6.37 ± 0.20 aB  | 6.37 ± 0.21 B    | 6.08 ± 0.40 aB   | <i>p</i> < 0.01                          |
|                | Heavy-saline | Pokkali                               | 7.23 ± 0.97 A    | 3.04 ± 0.11 cC   | 3.16 ± 0.11 bC  | 4.41 ± 0.85 bBC | 5.58 ± 0.35 AB   | 3.31 ± 0.33 C    | <i>p</i> < 0.01                          |
|                |              | RD73                                  | 9.01 ± 0.51 A    | 3.58 ± 0.10 aC   | 5.97 ± 0.15 aB  | 5.88 ± 0.15 aB  | 5.24 ± 1.15 BC   | 4.86 ± 0.92 BC   | <i>p</i> < 0.01                          |
|                |              | CSSL8-94                              | 9.81 ± 0.13 A    | 3.42 ± 0.15 abD  | 6.23 ± 0.22 aB  | 6.16 ± 0.22 aB  | 6.45 ± 0.41 B    | 4.91 ± 0.86 C    | <i>p</i> < 0.01                          |
|                |              | TSKC1-144                             | 7.51 ± 0.48 A    | 3.13 ± 0.06 bcC  | 5.67 ± 0.09 aB  | 5.81 ± 0.07 aB  | 3.83 ± 0.27 C    | 4.02 ± 0.78 C    | <i>p</i> < 0.01                          |
|                |              | KDML105                               | 8.45 ± 0.73 A    | 3.43 ± 0.14 abC  | 6.16 ± 0.34 aB  | 6.27 ± 0.22 aB  | 6.18 ± 0.56 B    | 4.88 ± 0.91 BC   | <i>p</i> < 0.01                          |
|                |              | <sup>1</sup> Critical- <i>p</i> value | ns               | <i>p</i> < 0.05  | <i>p</i> < 0.01 | <i>p</i> < 0.05 | ns               | ns               |                                          |
|                |              | mean                                  | 8.40 ± 0.33 aA   | 3.32 ± 0.07 cD   | 5.44 ± 0.28 cB  | 5.71 ± 0.22 bB  | 5.45 ± 0.33 B    | 4.40 ± 0.35 bC   | <i>p</i> < 0.01                          |
|                |              | <sup>3</sup> Critical- <i>p</i> value | <i>p</i> < 0.01  | <i>p</i> < 0.01  | <i>p</i> < 0.01 | <i>p</i> < 0.01 | ns               | <i>p</i> < 0.01  |                                          |
| WUE            | Non-saline   | Pokkali                               | 3.53 ± 0.35 bAB  | 2.29 ± 0.04 cC   | 3.11 ± 0.06 B   | 3.46 ± 0.27 AB  | 3.64 ± 0.19 bAB  | 4.03 ± 0.35 aA   | <i>p</i> < 0.01                          |
|                |              | RD73                                  | 4.95 ± 0.18 abA  | 2.49 ± 0.08 abC  | 3.54 ± 0.31 B   | 3.53 ± 0.32 B   | 3.49 ± 0.16 bB   | 1.99 ± 0.14 bC   | <i>p</i> < 0.01                          |
|                |              | CSSL8-94                              | 5.72 ± 0.46 abA  | 2.35 ± 0.04 bcC  | 3.67 ± 0.20 B   | 3.80 ± 0.35 B   | 4.14 ± 0.28 abB  | 2.14 ± 0.09 bC   | <i>p</i> < 0.01                          |
|                |              | TSKC1-144                             | 3.96 ± 0.29 abAB | 2.63 ± 0.05 aCD  | 3.40 ± 0.09 BC  | 4.13 ± 0.40 AB  | 4.73 ± 0.29 aA   | 2.33 ± 0.14 bD   | <i>p</i> < 0.01                          |
|                |              | KDML105                               | 5.30 ± 0.93 abA  | 2.34 ± 0.01 bcC  | 3.07 ± 0.20 BC  | 3.46 ± 0.44 B   | 3.88 ± 0.23 bB   | 2.14 ± 0.17 bC   | <i>p</i> < 0.01                          |
|                |              | <sup>1</sup> Critical- <i>p</i> value | <i>p</i> < 0.05  | <i>p</i> < 0.01  | ns              | ns              | <i>p</i> < 0.05  | <i>p</i> < 0.01  |                                          |
|                |              | mean                                  | 4.69 ± 0.28 aA   | 2.42 ± 0.03 cD   | 3.36 ± 0.09 bC  | 3.68 ± 0.16 bBC | 3.98 ± 0.14 B    | 2.53 ± 0.19 D    | <i>p</i> < 0.05                          |
|                | Semi-saline  | Pokkali                               | 3.14 ± 0.13 C    | 5.52 ± 0.40 AB   | 6.06 ± 0.48 aA  | 4.49 ± 0.81 BC  | 3.24 ± 0.12 cC   | 3.94 ± 0.55 aC   | <i>p</i> < 0.01                          |

| Parameter | Saline field | Rice genotype                         | Early vegetative | Stem elongation  | Early booting   | Flowering        | Milky            | Mature          | <sup>2</sup> Critical-<br><i>p</i> value |
|-----------|--------------|---------------------------------------|------------------|------------------|-----------------|------------------|------------------|-----------------|------------------------------------------|
|           |              |                                       |                  |                  |                 |                  |                  |                 | <i>p</i> value                           |
| ΦPSII     | Saline       | RD73                                  | 3.14 ± 0.03 B    | 5.57 ± 0.41 A    | 3.20 ± 0.09 bB  | 3.39 ± 0.07 B    | 3.57 ± 0.26 bcB  | 2.29 ± 0.19 bC  | <i>p</i> < 0.01                          |
|           |              | CSSL8-94                              | 3.20 ± 0.16 C    | 5.66 ± 0.27 A    | 3.22 ± 0.15 bBC | 3.45 ± 0.10 BC   | 3.85 ± 0.33 bB   | 2.22 ± 0.07 bD  | <i>p</i> < 0.01                          |
|           |              | TSKC1-144                             | 3.21 ± 0.19 C    | 6.54 ± 0.57 A    | 3.37 ± 0.06 bC  | 3.28 ± 0.13 C    | 4.44 ± 0.26 aB   | 2.74 ± 0.15 bC  | <i>p</i> < 0.01                          |
|           |              | KDML105                               | 3.17 ± 0.03 CD   | 5.36 ± 0.40 A    | 3.12 ± 0.07 bCD | 3.59 ± 0.25 BC   | 4.09 ± 0.10 abB  | 2.70 ± 0.15 bD  | <i>p</i> < 0.01                          |
|           |              | <sup>1</sup> Critical- <i>p</i> value | ns               | ns               | <i>p</i> < 0.01 | ns               | <i>p</i> < 0.05  | <i>p</i> < 0.01 |                                          |
|           |              | mean                                  | 3.17 ± 0.05 bCD  | 5.73 ± 0.19 bA   | 3.79 ± 0.28 bB  | 3.64 ± 0.18 bBC  | 3.84 ± 0.13 B    | 2.78 ± 0.18 D   | <i>p</i> < 0.01                          |
|           | Heavy-saline | Pokkali                               | 3.73 ± 0.37 C    | 7.48 ± 0.37 AB   | 8.21 ± 0.12 aA  | 5.92 ± 1.23 B    | 3.65 ± 0.13 C    | 3.82 ± 0.18 aC  | <i>p</i> < 0.01                          |
|           |              | RD73                                  | 3.46 ± 0.18 C    | 8.04 ± 0.33 A    | 4.15 ± 0.12 bB  | 3.97 ± 0.06 BC   | 3.83 ± 0.30      | 2.55 ± 0.37 bD  | <i>p</i> < 0.01                          |
|           |              | CSSL8-94                              | 3.21 ± 0.08 C    | 7.81 ± 0.42 A    | 3.90 ± 0.09 bB  | 4.05 ± 0.20 B    | 3.55 ± 0.14 BC   | 2.25 ± 0.10 bD  | <i>p</i> < 0.01                          |
|           |              | TSKC1-144                             | 3.54 ± 0.17 C    | 7.97 ± 0.34 A    | 4.09 ± 0.09 bBC | 4.19 ± 0.05 B    | 4.44 ± 0.19 B    | 2.27 ± 0.16 bD  | <i>p</i> < 0.01                          |
|           |              | KDML105                               | 3.41 ± 0.28 C    | 7.60 ± 0.31 A    | 4.14 ± 0.11 bBC | 4.26 ± 0.17 B    | 3.77 ± 0.25 BC   | 2.38 ± 0.32 bD  | <i>p</i> < 0.01                          |
|           |              | <sup>1</sup> Critical- <i>p</i> value | ns               | ns               | <i>p</i> < 0.01 | ns               | ns               | <i>p</i> < 0.05 |                                          |
|           |              | mean                                  | 3.47 ± 0.10 bC   | 7.78 ± 0.15 aA   | 4.90 ± 0.38 aB  | 4.48 ± 0.28 aB   | 3.85 ± 0.11 C    | 2.65 ± 0.17 D   | <i>p</i> < 0.01                          |
|           |              | <sup>3</sup> Critical- <i>p</i> value | <i>p</i> < 0.01  | <i>p</i> < 0.01  | <i>p</i> < 0.01 | <i>p</i> < 0.05  | ns               | ns              |                                          |
|           | Non-saline   | Pokkali                               | 0.32 ± 0.01 A    | 0.24 ± 0.01 B    | 0.24 ± 0.01 B   | 0.25 ± 0.01 B    | 0.25 ± 0.01 ab B | 0.15 ± 0.01 C   | <i>p</i> < 0.01                          |
|           |              | RD73                                  | 0.32 ± 0.01 A    | 0.26 ± 0.01 BC   | 0.31 ± 0.02 AB  | 0.25 ± 0.03 C    | 0.23 ± 0.01 bC   | 0.16 ± 0.01 D   | <i>p</i> < 0.01                          |
|           |              | CSSL8-94                              | 0.30 ± 0.01 A    | 0.27 ± 0.02 AB   | 0.31 ± 0.02 A   | 0.23 ± 0.03 B    | 0.17 ± 0.01 cC   | 0.17 ± 0.01 C   | <i>p</i> < 0.01                          |
|           |              | TSKC1-144                             | 0.32 ± 0.01 A    | 0.27 ± 0.01 BC   | 0.30 ± 0.01 AB  | 0.29 ± 0.01 AB   | 0.25 ± 0.01 abC  | 0.16 ± 0.02 D   | <i>p</i> < 0.01                          |
|           |              | KDML105                               | 0.30 ± 0.01 A    | 0.27 ± 0.01 A    | 0.27 ± 0.02 A   | 0.28 ± 0.02 A    | 0.27 ± 0.01 aA   | 0.19 ± 0.01 B   | <i>p</i> < 0.01                          |
|           |              | <sup>1</sup> Critical- <i>p</i> value | ns               | ns               | ns              | ns               | <i>p</i> < 0.01  | ns              |                                          |
|           |              | mean                                  | 0.31 ± 0.01 aA   | 0.26 ± 0.01 bC   | 0.29 ± 0.01 aB  | 0.26 ± 0.01 abC  | 0.23 ± 0.01 D    | 0.16 ± 0.01 aE  | <i>p</i> < 0.01                          |
|           | Semi-saline  | Pokkali                               | 0.29 ± 0.01 A    | 0.25 ± 0.02 A    | 0.28 ± 0.03 A   | 0.24 ± 0.02 A    | 0.24 ± 0.02 A    | 0.16 ± 0.01 B   | <i>p</i> < 0.01                          |
|           |              | RD73                                  | 0.31 ± 0.01 A    | 0.26 ± 0.02 B    | 0.22 ± 0.01 B   | 0.25 ± 0.02 B    | 0.24 ± 0.02 B    | 0.16 ± 0.01 C   | <i>p</i> < 0.01                          |
|           |              | CSSL8-94                              | 0.28 ± 0.01 A    | 0.27 ± 0.01 AB   | 0.24 ± 0.01 BC  | 0.24 ± 0.01 BC   | 0.23 ± 0.01 C    | 0.15 ± 0.01 D   | <i>p</i> < 0.01                          |
|           |              | TSKC1-144                             | 0.31 ± 0.01 A    | 0.28 ± 0.02 AB   | 0.24 ± 0.01 B   | 0.23 ± 0.01 B    | 0.27 ± 0.02 AB   | 0.12 ± 0.01 C   | <i>p</i> < 0.01                          |
|           |              | KDML105                               | 0.30 ± 0.01 A    | 0.28 ± 0.02 AB   | 0.22 ± 0.01 C   | 0.24 ± 0.01 BC   | 0.27 ± 0.02 AB   | 0.17 ± 0.02 D   | <i>p</i> < 0.01                          |
|           |              | <sup>1</sup> Critical- <i>p</i> value | ns               | ns               | ns              | ns               | ns               | ns              |                                          |
|           |              | mean                                  | 0.30 ± 0.01 abA  | 0.27 ± 0.01 bB   | 0.24 ± 0.01 bC  | 0.24 ± 0.01 bC   | 0.25 ± 0.01 BC   | 0.15 ± 0.01 abD | <i>p</i> < 0.01                          |
|           | Heavy-saline | Pokkali                               | 0.26 ± 0.01 bCD  | 0.30 ± 0.01 AB   | 0.34 ± 0.01 aA  | 0.28 ± 0.03 BC   | 0.23 ± 0.01 D    | 0.14 ± 0.01 E   | <i>p</i> < 0.01                          |
|           |              | RD73                                  | 0.30 ± 0.01 aAB  | 0.34 ± 0.02 A    | 0.29 ± 0.01 bB  | 0.27 ± 0.01 B    | 0.22 ± 0.03 C    | 0.15 ± 0.02 D   | <i>p</i> < 0.01                          |
|           |              | CSSL8-94                              | 0.31 ± 0.01 aAB  | 0.32 ± 0.01 A    | 0.26 ± 0.01 bBC | 0.27 ± 0.01 BC   | 0.25 ± 0.03 C    | 0.15 ± 0.01 D   | <i>p</i> < 0.01                          |
|           |              | TSKC1-144                             | 0.28 ± 0.01 abB  | 0.34 ± 0.02 A    | 0.27 ± 0.01 bB  | 0.28 ± 0.01 B    | 0.21 ± 0.02 C    | 0.11 ± 0.01 D   | <i>p</i> < 0.01                          |
|           |              | KDML105                               | 0.30 ± 0.01 aA   | 0.33 ± 0.02 A    | 0.29 ± 0.01 bAB | 0.29 ± 0.02 AB   | 0.24 ± 0.01 B    | 0.15 ± 0.03 C   | <i>p</i> < 0.01                          |
|           |              | <sup>1</sup> Critical- <i>p</i> value | <i>p</i> < 0.05  | ns               | <i>p</i> < 0.01 | ns               | ns               | ns              |                                          |
|           |              | mean                                  | 0.29 ± 0.01 bB   | 0.33 ± 0.01 aA   | 0.29 ± 0.01 aB  | 0.28 ± 0.01 aB   | 0.23 ± 0.01 C    | 0.14 ± 0.01 bD  | <i>p</i> < 0.01                          |
|           |              | <sup>3</sup> Critical- <i>p</i> value | <i>p</i> < 0.05  | <i>p</i> < 0.01  | <i>p</i> < 0.01 | <i>p</i> < 0.01  | ns               | <i>p</i> < 0.05 |                                          |
|           | Non-saline   | Pokkali                               | 0.48 ± 0.01 b B  | 0.53 ± 0.02 a-cA | 0.47 ± 0.02 cB  | 0.46 ± 0.02 cB   | 0.50 ± 0.01 bcAB | 0.34 ± 0.02 C   | <i>p</i> < 0.01                          |
|           |              | RD73                                  | 0.52 ± 0.02 abA  | 0.58 ± 0.01 aA   | 0.57 ± 0.01 abA | 0.58 ± 0.01 aA   | 0.56 ± 0.02 aA   | 0.40 ± 0.04 B   | <i>p</i> < 0.01                          |
|           |              | CSSL8-94                              | 0.53 ± 0.01 aA   | 0.54 ± 0.03 abA  | 0.57 ± 0.01 abA | 0.57 ± 0.01 abA  | 0.55 ± 0.01 abA  | 0.40 ± 0.03 B   | <i>p</i> < 0.01                          |
|           |              | TSKC1-144                             | 0.48 ± 0.01 bA   | 0.49 ± 0.01 cA   | 0.53 ± 0.02 bA  | 0.51 ± 0.03 bcA  | 0.49 ± 0.02 cA   | 0.33 ± 0.03 B   | <i>p</i> < 0.01                          |
|           |              | KDML105                               | 0.49 ± 0.02 abB  | 0.52 ± 0.01 bcB  | 0.61 ± 0.02 aA  | 0.56 ± 0.03 abAB | 0.50 ± 0.03 bcB  | 0.39 ± 0.02 C   | <i>p</i> < 0.01                          |
|           |              | <sup>1</sup> Critical- <i>p</i> value | <i>p</i> < 0.05  | <i>p</i> < 0.05  | <i>p</i> < 0.01 | <i>p</i> < 0.01  | <i>p</i> < 0.05  | ns              |                                          |
|           |              | mean                                  | 0.50 ± 0.01 cC   | 0.53 ± 0.01 bAB  | 0.55 ± 0.01 cA  | 0.53 ± 0.01 bAB  | 0.52 ± 0.01 BC   | 0.37 ± 0.01 cD  | <i>p</i> < 0.01                          |
| Fv'/Fm'   | Non-saline   | Pokkali                               | 0.48 ± 0.01 b B  | 0.53 ± 0.02 a-cA | 0.47 ± 0.02 cB  | 0.46 ± 0.02 cB   | 0.50 ± 0.01 bcAB | 0.34 ± 0.02 C   | <i>p</i> < 0.01                          |
|           |              | RD73                                  | 0.52 ± 0.02 abA  | 0.58 ± 0.01 aA   | 0.57 ± 0.01 abA | 0.58 ± 0.01 aA   | 0.56 ± 0.02 aA   | 0.40 ± 0.04 B   | <i>p</i> < 0.01                          |
|           |              | CSSL8-94                              | 0.53 ± 0.01 aA   | 0.54 ± 0.03 abA  | 0.57 ± 0.01 abA | 0.57 ± 0.01 abA  | 0.55 ± 0.01 abA  | 0.40 ± 0.03 B   | <i>p</i> < 0.01                          |
|           |              | TSKC1-144                             | 0.48 ± 0.01 bA   | 0.49 ± 0.01 cA   | 0.53 ± 0.02 bA  | 0.51 ± 0.03 bcA  | 0.49 ± 0.02 cA   | 0.33 ± 0.03 B   | <i>p</i> < 0.01                          |
|           |              | KDML105                               | 0.49 ± 0.02 abB  | 0.52 ± 0.01 bcB  | 0.61 ± 0.02 aA  | 0.56 ± 0.03 abAB | 0.50 ± 0.03 bcB  | 0.39 ± 0.02 C   | <i>p</i> < 0.01                          |
|           |              | <sup>1</sup> Critical- <i>p</i> value | <i>p</i> < 0.05  | <i>p</i> < 0.05  | <i>p</i> < 0.01 | <i>p</i> < 0.01  | <i>p</i> < 0.05  | ns              |                                          |
|           |              | mean                                  | 0.50 ± 0.01 cC   | 0.53 ± 0.01 bAB  | 0.55 ± 0.01 cA  | 0.53 ± 0.01 bAB  | 0.52 ± 0.01 BC   | 0.37 ± 0.01 cD  | <i>p</i> < 0.01                          |

| Parameter                                                  | Saline field | Rice genotype                         | Early vegetative  | Stem elongation   | Early booting    | Flowering         | Milky            | Mature           | <sup>2</sup> Critical-<br><i>p</i> value |
|------------------------------------------------------------|--------------|---------------------------------------|-------------------|-------------------|------------------|-------------------|------------------|------------------|------------------------------------------|
| ETR<br>( $\mu\text{mol e}^- \text{m}^{-2} \text{s}^{-1}$ ) | Semi-saline  | Pokkali                               | 0.58 ± 0.01 A     | 0.56 ± 0.01 bcA   | 0.56 ± 0.02 cA   | 0.57 ± 0.02 bA    | 0.58 ± 0.03 A    | 0.44 ± 0.01 B    | <i>p</i> < 0.01                          |
|                                                            |              | RD73                                  | 0.57 ± 0.02 BC    | 0.60 ± 0.02 abABC | 0.62 ± 0.02 aAB  | 0.63 ± 0.01 aA    | 0.56 ± 0.03 CD   | 0.52 ± 0.03 D    | <i>p</i> < 0.05                          |
|                                                            |              | CSSL8-94                              | 0.57 ± 0.01 AB    | 0.61 ± 0.02 aA    | 0.58 ± 0.01 bcAB | 0.62 ± 0.01 aA    | 0.54 ± 0.03 BC   | 0.50 ± 0.03 C    | <i>p</i> < 0.01                          |
|                                                            |              | TSKC1-144                             | 0.58 ± 0.02 A     | 0.52 ± 0.01 cB    | 0.62 ± 0.01 abA  | 0.61 ± 0.01 aA    | 0.51 ± 0.01 B    | 0.40 ± 0.03 C    | <i>p</i> < 0.01                          |
|                                                            |              | KDML105                               | 0.59 ± 0.01 A     | 0.60 ± 0.01 abA   | 0.63 ± 0.01 aA   | 0.62 ± 0.01 aA    | 0.53 ± 0.02 B    | 0.49 ± 0.03 B    | <i>p</i> < 0.01                          |
|                                                            |              | <sup>1</sup> Critical- <i>p</i> value | ns                | <i>p</i> < 0.01   | <i>p</i> < 0.01  | <i>p</i> < 0.05   | ns               | ns               |                                          |
|                                                            |              | mean                                  | 0.58 ± 0.01 aB    | 0.58 ± 0.01 aB    | 0.60 ± 0.01 aAB  | 0.61 ± 0.01 aA    | 0.54 ± 0.01 C    | 0.47 ± 0.02 aD   | <i>p</i> < 0.01                          |
|                                                            | Heavy-saline | Pokkali                               | 0.52 ± 0.01 bcBC  | 0.49 ± 0.01 cC    | 0.52 ± 0.01 cBC  | 0.54 ± 0.02 bAB   | 0.57 ± 0.01 aA   | 0.38 ± 0.02 bD   | <i>p</i> < 0.01                          |
|                                                            |              | RD73                                  | 0.55 ± 0.01 abB   | 0.57 ± 0.01 aB    | 0.61 ± 0.01 aA   | 0.62 ± 0.01 aA    | 0.50 ± 0.02 bcC  | 0.50 ± 0.02 aC   | <i>p</i> < 0.01                          |
|                                                            |              | CSSL8-94                              | 0.57 ± 0.01 aB    | 0.54 ± 0.01 abBC  | 0.61 ± 0.01 aA   | 0.61 ± 0.01 aA    | 0.52 ± 0.02 abC  | 0.40 ± 0.01 bD   | <i>p</i> < 0.01                          |
|                                                            |              | TSKC1-144                             | 0.51 ± 0.02 cBC   | 0.51 ± 0.01 bcBC  | 0.56 ± 0.01 bAB  | 0.58 ± 0.01 aA    | 0.46 ± 0.02 cC   | 0.40 ± 0.04 bD   | <i>p</i> < 0.01                          |
|                                                            |              | KDML105                               | 0.56 ± 0.02 aBC   | 0.54 ± 0.01 abBC  | 0.59 ± 0.01 aAB  | 0.62 ± 0.01 aA    | 0.53 ± 0.01 abC  | 0.45 ± 0.03 abD  | <i>p</i> < 0.01                          |
|                                                            |              | <sup>1</sup> Critical- <i>p</i> value | <i>p</i> < 0.05   | <i>p</i> < 0.01   | <i>p</i> < 0.01  | <i>p</i> < 0.01   | <i>p</i> < 0.05  | <i>p</i> < 0.05  |                                          |
|                                                            |              | mean                                  | 0.54 ± 0.01 bB    | 0.53 ± 0.01 bBC   | 0.58 ± 0.01 bA   | 0.59 ± 0.01 aA    | 0.52 ± 0.01 C    | 0.43 ± 0.01 bD   | <i>p</i> < 0.01                          |
|                                                            |              | <sup>3</sup> Critical- <i>p</i> value | <i>p</i> < 0.01   | <i>p</i> < 0.01   | <i>p</i> < 0.01  | <i>p</i> < 0.01   | ns               | <i>p</i> < 0.01  |                                          |
|                                                            | Non-saline   | Pokkali                               | 172 ± 1 A         | 129 ± 8 B         | 129 ± 6 B        | 132 ± 7 B         | 135 ± 7 abB      | 80 ± 5 C         | <i>p</i> < 0.01                          |
|                                                            |              | RD73                                  | 172 ± 6 A         | 138 ± 5 BC        | 164 ± 12 AB      | 133 ± 15 C        | 123 ± 6 bC       | 85 ± 6 D         | <i>p</i> < 0.01                          |
|                                                            |              | CSSL8-94                              | 161 ± 8 A         | 146 ± 9 AB        | 162 ± 9 A        | 122 ± 15 B        | 90 ± 5 cC        | 91 ± 5 C         | <i>p</i> < 0.01                          |
|                                                            |              | TSKC1-144                             | 169 ± 4 B         | 146 ± 4 AB        | 158 ± 4 AB       | 154 ± 6 A         | 132 ± 8 abAB     | 87 ± 8 C         | <i>p</i> < 0.01                          |
|                                                            |              | KDML105                               | 160 ± 7 A         | 146 ± 7 A         | 146 ± 11 A       | 147 ± 10 A        | 143 ± 6 aA       | 100 ± 2 B        | <i>p</i> < 0.01                          |
|                                                            |              | <sup>1</sup> Critical- <i>p</i> value | ns                | ns                | ns               | ns                | <i>p</i> < 0.01  | ns               |                                          |
|                                                            |              | mean                                  | 167.28 ± 2.57 aA  | 141.39 ± 3.19 bC  | 152.47 ± 4.64 aB | 138.18 ± 5.25 abC | 125.04 ± 4.93 D  | 89.10 ± 2.78 aE  | <i>p</i> < 0.01                          |
|                                                            | Semi-saline  | Pokkali                               | 155 ± 7 A         | 132 ± 10 A        | 148 ± 15 A       | 130 ± 9 A         | 127 ± 12 A       | 87 ± 7 B         | <i>p</i> < 0.01                          |
|                                                            |              | RD73                                  | 167 ± 7 A         | 136 ± 12 B        | 116 ± 5 B        | 133 ± 9 B         | 126 ± 12 B       | 87 ± 6 C         | <i>p</i> < 0.01                          |
|                                                            |              | CSSL8-94                              | 151 ± 5 A         | 144 ± 6 AB        | 128 ± 4 BC       | 129 ± 6 BC        | 121 ± 8 C        | 82 ± 8 D         | <i>p</i> < 0.01                          |
|                                                            |              | TSKC1-144                             | 164 ± 8 A         | 149 ± 10 AB       | 130 ± 6 B        | 125 ± 7 B         | 145 ± 9 AB       | 66 ± 7 C         | <i>p</i> < 0.01                          |
|                                                            |              | KDML105                               | 160 ± 2 A         | 149 ± 13 AB       | 117 ± 4 C        | 126 ± 7 BC        | 143 ± 9 AB       | 91 ± 9 D         | <i>p</i> < 0.01                          |
|                                                            |              | <sup>1</sup> Critical- <i>p</i> value | ns                | ns                | ns               | ns                | ns               | ns               |                                          |
|                                                            |              | mean                                  | 159.76 ± 2.85 abA | 142.52 ± 4.42 bB  | 128.38 ± 4.10 bC | 129.08 ± 3.08 bC  | 132.90 ± 4.53 BC | 83.04 ± 3.55 abD | <i>p</i> < 0.01                          |
|                                                            | Heavy-saline | Pokkali                               | 138 ± 5 bCD       | 161 ± 8 AB        | 180 ± 5 aA       | 150 ± 14 BC       | 124 ± 4 D        | 78 ± 2 E         | <i>p</i> < 0.01                          |
|                                                            |              | RD73                                  | 162 ± 5 aAB       | 182 ± 8 A         | 155 ± 4 bB       | 146 ± 4 B         | 117 ± 15 C       | 81 ± 9 D         | <i>p</i> < 0.01                          |
|                                                            |              | CSSL8-94                              | 165 ± 6 aAB       | 173 ± 7 A         | 140 ± 7 bBC      | 144 ± 7 BC        | 135 ± 14 C       | 80 ± 7 D         | <i>p</i> < 0.01                          |
|                                                            |              | TSKC1-144                             | 151 ± 5 abB       | 183 ± 8 A         | 146 ± 7 bB       | 148 ± 5 B         | 111 ± 9 C        | 58 ± 5 D         | <i>p</i> < 0.01                          |
|                                                            |              | KDML105                               | 157 ± 4 aA        | 173 ± 9A          | 157 ± 6 bAB      | 153 ± 10AB        | 130 ± 6 B        | 80 ± 13 C        | <i>p</i> < 0.01                          |
|                                                            |              | <sup>1</sup> Critical- <i>p</i> value | <i>p</i> < 0.05   | ns                | <i>p</i> < 0.01  | ns                | ns               | ns               |                                          |
|                                                            |              | mean                                  | 155.17 ± 2.94 bB  | 174.87 ± 3.68 aA  | 156.09 ± 3.89 aB | 148.59 ± 3.49 aB  | 123.62 ± 4.54 C  | 75.85 ± 3.82 bD  | <i>p</i> < 0.01                          |
|                                                            |              | <sup>3</sup> Critical- <i>p</i> value | <i>p</i> < 0.05   | <i>p</i> < 0.01   | <i>p</i> < 0.01  | <i>p</i> < 0.01   | ns               | <i>p</i> < 0.05  |                                          |

<sup>1</sup>Critical-*p* value for testing each trait among genotypes within growth stage (the same column). <sup>2</sup> Critical-*p* value for testing each trait among growth stages of each genotype (the same row) and

<sup>3</sup> critical-*p* value for testing each trait among salinity fields within growth stage. [Values in the brackets indicated percentage increase (+) or decrease (-) in the saline fields compared with that in the non-saline field]

**Supplementary Table S3.** Plant height and biomass of leaf, stem, root and total biomass at maturity of five rice genotypes including Pokkali, RD73, CSSL8-94, TSKC1-144 and KDML105 after grew under non-saline (control), semi-saline and heavy-saline field measured at four growth stage including early vegetative, stem elongation, flowering and mature stage. Means which are significantly different ( $p < 0.05$ ) among genotypes for each saline field and field across genotypes are denoted by different lower-case letters. For each genotype means which are significantly different ( $p < 0.05$ ) among growth stage are denoted with capital letters. Data shows mean of four replicates  $\pm$  standard error (SE).

| Parameter                                           | Saline field | Rice genotype                    | Early vegetative    | Stem elongation     | Flowering           | Mature                | <sup>2</sup> Critical- $p$ value |
|-----------------------------------------------------|--------------|----------------------------------|---------------------|---------------------|---------------------|-----------------------|----------------------------------|
| Plant height (cm)                                   | Non-saline   | Pokkali                          | 40 $\pm$ 1 aD       | 137 $\pm$ 3 aC      | 155 $\pm$ 2 bB      | 178 $\pm$ 2 aA        | $p > 0.01$                       |
|                                                     |              | RD73                             | 34 $\pm$ 1 bD       | 106 $\pm$ 3 bcC     | 151 $\pm$ 3 bcB     | 163 $\pm$ 1 bA        | $p > 0.01$                       |
|                                                     |              | CSSL8-94                         | 40 $\pm$ 1 aC       | 102 $\pm$ 4 cB      | 152 $\pm$ 2 bcA     | 156 $\pm$ 1 bA        | $p > 0.01$                       |
|                                                     |              | TSKC1-144                        | 39 $\pm$ 1 aC       | 117 $\pm$ 3 bB      | 170 $\pm$ 1 aA      | 176 $\pm$ 2 aA        | $p > 0.01$                       |
|                                                     |              | KDML105                          | 39 $\pm$ 1 aC       | 102 $\pm$ 7 cB      | 147 $\pm$ 1 cA      | 156 $\pm$ 4 bA        | $p > 0.01$                       |
|                                                     |              | <sup>1</sup> Critical- $p$ value | $p > 0.05$          | $p > 0.01$          | $p > 0.01$          | $p > 0.01$            |                                  |
|                                                     |              | mean                             | <b>38.925 D</b>     | <b>113.15 aC</b>    | <b>155.35 aB</b>    | <b>166.2 aA</b>       | $p > 0.01$                       |
|                                                     | Semi-saline  | Pokkali                          | 35 $\pm$ 1 cC       | 123 $\pm$ 6 aB      | 159 $\pm$ 7 aA      | 152 $\pm$ 1 abA       | $p > 0.01$                       |
|                                                     |              | RD73                             | 35 $\pm$ 1 cC       | 104 $\pm$ 1 bB      | 138 $\pm$ 3 bA      | 136 $\pm$ 8 cA        | $p > 0.01$                       |
|                                                     |              | CSSL8-94                         | 42 $\pm$ 1 aC       | 107 $\pm$ 2 bB      | 152 $\pm$ 3 abA     | 147 $\pm$ 5 bcA       | $p > 0.01$                       |
|                                                     |              | TSKC1-144                        | 39 $\pm$ 1 abC      | 102 $\pm$ 3 bB      | 167 $\pm$ 3 aA      | 167 $\pm$ 3 aA        | $p > 0.01$                       |
|                                                     |              | KDML105                          | 37 $\pm$ 1 bcC      | 104 $\pm$ 4 bB      | 140 $\pm$ 1 bA      | 132 $\pm$ 3 cA        | $p > 0.01$                       |
|                                                     |              | <sup>1</sup> Critical- $p$ value | $p > 0.05$          | $p > 0.05$          | $p > 0.01$          | $p > 0.01$            |                                  |
|                                                     |              | mean                             | <b>38.05 C</b>      | <b>108.55 aB</b>    | <b>151.5 aA</b>     | <b>146.95 bA</b>      | $p > 0.01$                       |
|                                                     | Heavy-saline | Pokkali                          | 33 $\pm$ 2 C        | 116 $\pm$ 3 aB      | 150 $\pm$ 3 aA      | 163 $\pm$ 6 aA        | $p > 0.01$                       |
|                                                     |              | RD73                             | 35 $\pm$ 1 C        | 80 $\pm$ 11 bcB     | 121 $\pm$ 10 bA     | 120 $\pm$ 17 cA       | $p > 0.01$                       |
|                                                     |              | CSSL8-94                         | 57 $\pm$ 15 C       | 77 $\pm$ 3 cB       | 125 $\pm$ 2 bA      | 121 $\pm$ 3 cA        | $p > 0.01$                       |
|                                                     |              | TSKC1-144                        | 38 $\pm$ 1 C        | 101 $\pm$ 11 abB    | 148 $\pm$ 10 aA     | 148 $\pm$ 9 abA       | $p > 0.05$                       |
|                                                     |              | KDML105                          | 38 $\pm$ 1 C        | 77 $\pm$ 6 cB       | 131 $\pm$ 3 bA      | 127 $\pm$ 1 bcA       | $p > 0.01$                       |
|                                                     |              | <sup>1</sup> Critical- $p$ value | ns                  | $p > 0.01$          | $p > 0.01$          | $p > 0.01$            |                                  |
|                                                     |              | mean                             | <b>40.69 C</b>      | <b>90.50 bB</b>     | <b>135.15 bA</b>    | <b>136.15 bA</b>      | $p > 0.01$                       |
|                                                     |              | <sup>3</sup> Critical- $p$ value | ns                  | $p > 0.01$          | $p > 0.01$          | $p > 0.01$            |                                  |
| Leaf biomass (g <sub>dw</sub> plant <sup>-1</sup> ) | Non-saline   | Pokkali                          | 0.09 $\pm$ 0.01 aB  | 14.42 $\pm$ 1.93 bA | 16.06 $\pm$ 1.58 bA | 13.26 $\pm$ 0.69 cA   | $p > 0.01$                       |
|                                                     |              | RD73                             | 0.05 $\pm$ 0.01 cC  | 24.93 $\pm$ 2.51 aA | 20.28 $\pm$ 1.19 bB | 18.19 $\pm$ 0.70 bB   | $p > 0.01$                       |
|                                                     |              | CSSL8-94                         | 0.09 $\pm$ 0.01 abC | 25.54 $\pm$ 1.63 aA | 20.03 $\pm$ 2.33 bB | 21.40 $\pm$ 1.35 abAB | $p > 0.01$                       |
|                                                     |              | TSKC1-144                        | 0.07 $\pm$ 0.01 bcB | 24.35 $\pm$ 2.04 aA | 30.34 $\pm$ 5.19 aA | 23.44 $\pm$ 1.01 aA   | $p > 0.01$                       |
|                                                     |              | KDML105                          | 0.06 $\pm$ 0.01 cC  | 24.40 $\pm$ 0.98 aB | 30.37 $\pm$ 2.46 aA | 21.79 $\pm$ 1.75 aB   | $p > 0.01$                       |
|                                                     |              | <sup>1</sup> Critical- $p$ value | $p > 0.01$          | $p > 0.05$          | $p > 0.01$          | $p > 0.01$            |                                  |
|                                                     |              | mean                             | <b>0.07 C</b>       | <b>22.73 aAB</b>    | <b>23.41 aA</b>     | <b>19.62 aB</b>       | $p > 0.01$                       |
|                                                     | Semi-saline  | Pokkali                          | 0.06 $\pm$ 0.01 B   | 15.87 $\pm$ 2.10 A  | 21.89 $\pm$ 4.00 A  | 6.26 $\pm$ 0.76 cB    | $p > 0.01$                       |
|                                                     |              | RD73                             | 0.06 $\pm$ 0.01 D   | 9.22 $\pm$ 0.94 C   | 18.47 $\pm$ 1.13 A  | 12.16 $\pm$ 0.79 bcB  | $p > 0.01$                       |
|                                                     |              | CSSL8-94                         | 0.08 $\pm$ 0.01 C   | 15.13 $\pm$ 2.29 B  | 21.06 $\pm$ 1.49 A  | 23.89 $\pm$ 2.44 aA   | $p > 0.01$                       |
|                                                     |              | TSKC1-144                        | 0.08 $\pm$ 0.01 B   | 15.67 $\pm$ 2.76 AB | 28.42 $\pm$ 9.81 A  | 14.76 $\pm$ 1.85 bAB  | $p > 0.05$                       |
|                                                     |              | KDML105                          | 0.07 $\pm$ 0.01 C   | 11.62 $\pm$ 1.29 B  | 25.73 $\pm$ 3.31 A  | 26.07 $\pm$ 2.91 aA   | $p > 0.01$                       |
|                                                     |              |                                  |                     |                     |                     |                       |                                  |

| Parameter                                              | Saline field | Rice genotype                                 | Early vegetative          | Stem elongation             | Flowering                   | Mature                      | <sup>2</sup> Critical- <i>p</i> value |
|--------------------------------------------------------|--------------|-----------------------------------------------|---------------------------|-----------------------------|-----------------------------|-----------------------------|---------------------------------------|
|                                                        |              | <sup>1</sup> Critical- <i>p</i> value<br>mean | ns<br>0.07 C              | ns<br>13.50 bB              | ns<br>23.11 aA              | <i>p</i> > 0.01<br>16.63 aB | <i>p</i> > 0.01                       |
| Stem biomass<br>(g <sub>dw</sub> plant <sup>-1</sup> ) | Heavy-saline | Pokkali                                       | 0.03 ± 0.01 B             | 16.44 ± 2.16 A              | 17.20 ± 1.87 A              | 13.43 ± 1.99 aA             | <i>p</i> > 0.01                       |
|                                                        |              | RD73                                          | 0.06 ± 0.01 C             | 8.31 ± 2.41 B               | 14.60 ± 2.44 A              | 3.81 ± 0.54 b BC            | <i>p</i> > 0.01                       |
|                                                        |              | CSSL8-94                                      | 0.08 ± 0.01 C             | 10.34 ± 1.58 B              | 18.54 ± 3.32 A              | 12.55 ± 1.33 aAB            | <i>p</i> > 0.01                       |
|                                                        |              | TSKC1-144                                     | 0.07 ± 0.02 B             | 12.08 ± 1.68 A              | 19.71 ± 5.90 A              | 15.78 ± 3.58 aA             | <i>p</i> > 0.01                       |
|                                                        |              | KDML105                                       | 0.07 ± 0.01 C             | 9.05 ± 0.80 B               | 16.28 ± 1.97 A              | 12.31 ± 0.36 aB             | <i>p</i> > 0.01                       |
|                                                        |              | <sup>1</sup> Critical- <i>p</i> value<br>mean | ns<br>0.06 C              | ns<br>11.24 bB              | ns<br>17.26 bA              | <i>p</i> > 0.01<br>11.58 bB | <i>p</i> > 0.01                       |
|                                                        |              | <sup>3</sup> Critical- <i>p</i> value         | ns                        | <i>p</i> > 0.01             | <i>p</i> > 0.05             | <i>p</i> > 0.01             |                                       |
|                                                        | Non-saline   | Pokkali                                       | 0.03 ± 0.01 C             | 12.34 ± 1.33 B              | 23.07 ± 3.53 cA             | 18.99 ± 1.20 cA             | <i>p</i> > 0.01                       |
|                                                        |              | RD73                                          | 0.02 ± 0.01 C             | 18.53 ± 3.20 B              | 35.59 ± 3.04 bA             | 20.00 ± 1.12 cB             | <i>p</i> > 0.01                       |
|                                                        |              | CSSL8-94                                      | 0.04 ± 0.01 C             | 19.09 ± 2.46 B              | 30.30 ± 3.16 bcA            | 28.33 ± 1.94 bA             | <i>p</i> > 0.01                       |
|                                                        |              | TSKC1-144                                     | 0.03 ± 0.01 D             | 17.52 ± 3.29 C              | 54.01 ± 4.17 aA             | 33.57 ± 3.35 aB             | <i>p</i> > 0.01                       |
|                                                        |              | KDML105                                       | 0.03 ± 0.01 D             | 19.05 ± 1.60 C              | 52.91 ± 2.63 aA             | 26.12 ± 2.15 bB             | <i>p</i> > 0.01                       |
|                                                        |              | <sup>1</sup> Critical- <i>p</i> value<br>mean | ns<br>0.034 D             | ns<br>17.30 aC              | <i>p</i> > 0.01<br>39.17 aA | <i>p</i> > 0.01<br>25.40 bB | <i>p</i> > 0.01                       |
|                                                        | Semi-saline  | Pokkali                                       | 0.01 ± 0.01 cB            | 18.45 ± 5.53 A              | 21.30 ± 8.25 bA             | 29.11 ± 0.93 bA             | <i>p</i> > 0.01                       |
|                                                        |              | RD73                                          | 0.04 ± 0.01 bC            | 4.05 ± 0.46 C               | 22.56 ± 2.48 bB             | 30.38 ± 2.39 bA             | <i>p</i> > 0.01                       |
|                                                        |              | CSSL8-94                                      | 0.05 ± 0.01 aC            | 13.95 ± 3.68 B              | 26.16 ± 1.80 bA             | 24.16 ± 1.52 bA             | <i>p</i> > 0.01                       |
|                                                        |              | TSKC1-144                                     | 0.04 ± 0.01 bB            | 11.22 ± 1.70 B              | 46.62 ± 6.99 aA             | 48.20 ± 3.52 aA             | <i>p</i> > 0.01                       |
|                                                        |              | KDML105                                       | 0.03 ± 0.01 bC            | 8.89 ± 1.36 B               | 22.36 ± 3.49 bA             | 26.07 ± 3.23 bA             | <i>p</i> > 0.01                       |
|                                                        |              | <sup>1</sup> Critical- <i>p</i> value<br>mean | <i>p</i> > 0.01<br>0.03 C | ns<br>11.31 bB              | <i>p</i> > 0.05<br>27.80 bA | <i>p</i> > 0.01<br>31.59 aA | <i>p</i> > 0.01                       |
|                                                        | Heavy-saline | Pokkali                                       | 0.02 ± 0.01 bB            | 21.17 ± 5.01 aA             | 17.99 ± 3.36 A              | 16.94 ± 3.08 A              | <i>p</i> > 0.01                       |
|                                                        |              | RD73                                          | 0.03 ± 0.01 aC            | 5.85 ± 2.67 bBC             | 15.97 ± 5.04 AB             | 18.61 ± 5.49 A              | <i>p</i> > 0.05                       |
|                                                        |              | CSSL8-94                                      | 0.03 ± 0.01 aD            | 5.80 ± 1.51 bC              | 21.44 ± 2.78 A              | 11.15 ± 0.57 B              | <i>p</i> > 0.01                       |
|                                                        |              | TSKC1-144                                     | 0.03 ± 0.01 abC           | 10.70 ± 1.80 bBC            | 29.58 ± 6.76 A              | 16.42 ± 4.50 B              | <i>p</i> > 0.01                       |
|                                                        |              | KDML105                                       | 0.02 ± 0.01 abD           | 4.36 ± 1.16 bC              | 15.90 ± 2.10 BA             | 11.10 ± 1.15 B              | <i>p</i> > 0.01                       |
|                                                        |              | <sup>1</sup> Critical- <i>p</i> value<br>mean | <i>p</i> > 0.05<br>0.03 D | <i>p</i> > 0.05<br>9.58 bC  | ns<br>20.18 bA              | ns<br>14.84 cB              | <i>p</i> > 0.01                       |
|                                                        |              | <sup>3</sup> Critical- <i>p</i> value         | ns                        | <i>p</i> > 0.01             | <i>p</i> > 0.01             | <i>p</i> > 0.01             |                                       |
| Root biomass<br>(g <sub>dw</sub> plant <sup>-1</sup> ) | Non-saline   | Pokkali                                       | 0.03 ± 0.01 abC           | 26.44 ± 3.08 aA             | 10.71 ± 1.55 B              | 8.44 ± 1.54 B               | <i>p</i> > 0.01                       |
|                                                        |              | RD73                                          | 0.02 ± 0.01 bC            | 9.24 ± 1.81 bB              | 15.46 ± 1.11 A              | 13.47 ± 0.22 A              | <i>p</i> > 0.01                       |
|                                                        |              | CSSL8-94                                      | 0.05 ± 0.01 aC            | 14.67 ± 3.61 bAB            | 20.13 ± 1.75 A              | 8.24 ± 2.86 B               | <i>p</i> > 0.01                       |
|                                                        |              | TSKC1-144                                     | 0.03 ± 0.01 bB            | 15.41 ± 3.61 bA             | 17.29 ± 5.51 A              | 4.54 ± 0.83 B               | <i>p</i> > 0.01                       |
|                                                        |              | KDML105                                       | 0.04 ± 0.01 abC           | 31.46 ± 3.47 aA             | 14.07 ± 4.95 B              | 9.45 ± 2.96 BC              | <i>p</i> > 0.01                       |
|                                                        |              | <sup>1</sup> Critical- <i>p</i> value<br>mean | <i>p</i> > 0.05<br>0.03 C | <i>p</i> > 0.01<br>19.44 aA | ns<br>15.53 aA              | ns<br>8.83 bB               | <i>p</i> > 0.01                       |
|                                                        | Semi-saline  | Pokkali                                       | 0.03 ± 0.01 C             | 8.82 ± 1.06 B               | 16.02 ± 2.87 A              | 15.85 ± 2.13 A              | <i>p</i> > 0.01                       |
|                                                        |              | RD73                                          | 0.06 ± 0.02 B             | 10.10 ± 5.12 A              | 10.13 ± 2.30 A              | 15.25 ± 2.71 A              | <i>p</i> > 0.05                       |
|                                                        |              | CSSL8-94                                      | 0.03 ± 0.01 C             | 6.47 ± 0.51 B               | 9.36 ± 0.89 B               | 20.55 ± 2.56 A              | <i>p</i> > 0.01                       |
|                                                        |              | TSKC1-144                                     | 0.06 ± 0.01 B             | 7.01 ± 1.71 B               | 24.79 ± 9.32 A              | 15.12 ± 3.02 AB             | <i>p</i> > 0.05                       |
|                                                        |              | KDML105                                       | 0.03 ± 0.01 C             | 5.75 ± 1.43 B               | 20.22 ± 3.01 A              | 18.33 ± 1.56 A              | <i>p</i> > 0.01                       |

| Parameter                                               | Saline field | Rice genotype                         | Early vegetative      | Stem elongation        | Flowering               | Mature                  | <sup>2</sup> Critical- <i>p</i> value |
|---------------------------------------------------------|--------------|---------------------------------------|-----------------------|------------------------|-------------------------|-------------------------|---------------------------------------|
|                                                         |              | <sup>1</sup> Critical- <i>p</i> value | ns                    | ns                     | ns                      | ns                      |                                       |
|                                                         |              | mean                                  | 0.04 C                | 7.63 bB                | 16.10 aA                | 17.02 aA                | <i>p</i> > 0.01                       |
| Total biomass<br>(g <sub>dw</sub> plant <sup>-1</sup> ) | Heavy-saline | Pokkali                               | 0.01 ± 0.01 bB        | 9.56 ± 1.81 A          | 15.92 ± 4.22 A          | 10.86 ± 1.97 A          | <i>p</i> > 0.01                       |
|                                                         |              | RD73                                  | 0.04 ± 0.01 aB        | 3.34 ± 1.53 AB         | 6.59 ± 2.89 AB          | 9.91 ± 3.70 A           | <i>p</i> > 0.05                       |
|                                                         |              | CSSL8-94                              | 0.03 ± 0.01 abC       | 4.18 ± 0.76 BC         | 7.87 ± 2.30 AB          | 11.90 ± 2.19 A          | <i>p</i> > 0.01                       |
|                                                         |              | TSKC1-144                             | 0.04 ± 0.01 aB        | 6.39 ± 1.49 AB         | 8.85 ± 3.32 A           | 14.18 ± 4.19 A          | <i>p</i> > 0.05                       |
|                                                         |              | KDML105                               | 0.03 ± 0.01 aC        | 4.89 ± 2.79 B          | 3.73 ± 0.59 BC          | 10.29 ± 0.98 A          | <i>p</i> > 0.01                       |
|                                                         |              | <sup>1</sup> Critical- <i>p</i> value | <i>p</i> > 0.05       | ns                     | ns                      | ns                      |                                       |
|                                                         | Non-saline   | mean                                  | 0.03 C                | 5.67 bB                | 8.59 bAB                | 11.43 bA                | <i>p</i> > 0.01                       |
|                                                         |              | <sup>3</sup> Critical- <i>p</i> value | ns                    | <i>p</i> > 0.01        | <i>p</i> > 0.01         | <i>p</i> > 0.01         |                                       |
|                                                         |              |                                       |                       |                        |                         |                         |                                       |
|                                                         | Semi-saline  | Pokkali                               | 0.12 ± 0.01 C (-29%)  | 43.14 ± 8.48 B (-19%)  | 59.22 ± 9.67 B (+19%)   | 139.98 ± 6.07 A (+51%)  | <i>p</i> > 0.01                       |
|                                                         |              | RD73                                  | 0.16 ± 0.03 D (+78%)  | 23.37 ± 5.89 C (-56%)  | 51.16 ± 4.87 B (-28%)   | 173.94 ± 10.20 A (+24%) | <i>p</i> > 0.01                       |
|                                                         |              | CSSL8-94                              | 0.17 ± 0.01 D (-11%)  | 35.56 ± 6.07 C (-40%)  | 56.60 ± 0.31 B (-20%)   | 157.53 ± 7.25 A (+15%)  | <i>p</i> > 0.01                       |
|                                                         |              | TSKC1-144                             | 0.18 ± 0.02 C (+38%)  | 33.91 ± 5.75 C (-41%)  | 99.83 ± 24.98 B (-2%)   | 159.53 ± 10.60 A (+18%) | <i>p</i> > 0.01                       |
|                                                         |              | KDML105                               | 0.13 ± 0.01 C (0%)    | 26.27 ± 3.78 C (-65%)  | 68.32 ± 8.80 B (-30%)   | 167.89 ± 17.08 A (+11%) | <i>p</i> > 0.01                       |
|                                                         |              | <sup>1</sup> Critical- <i>p</i> value | ns                    | ns                     | ns                      | ns                      |                                       |
| Total biomass<br>(g <sub>dw</sub> plant <sup>-1</sup> ) | Heavy-saline | mean                                  | 0.15 D                | 32.45 bC               | 67.02 aB                | 159.78 aA               | <i>p</i> > 0.01                       |
|                                                         |              | Pokkali                               | 0.07 ± 0.01 bC (-59%) | 47.17 ± 8.51 aB (-11%) | 51.12 ± 9.27 B (+3%)    | 117.08 ± 15.94 A (+26%) | <i>p</i> > 0.01                       |
|                                                         |              | RD73                                  | 0.14 ± 0.01 aB (+56%) | 17.51 ± 6.54 bB (-67%) | 37.17 ± 9.56 AB (-48%)  | 71.19 ± 26.41 A (-48%)  | <i>p</i> > 0.05                       |
|                                                         |              | CSSL8-94                              | 0.14 ± 0.01 aD (-26%) | 20.33 ± 3.63 bC (-66%) | 47.86 ± 7.83 B (-32%)   | 84.29 ± 6.72 A (-38%)   | <i>p</i> > 0.01                       |
|                                                         |              | TSKC1-144                             | 0.15 ± 0.03 aC (+15%) | 29.18 ± 3.7 bBC (-49%) | 58.16 ± 14.29 AB (-43%) | 85.03 ± 21.95 A (-36%)  | <i>p</i> > 0.01                       |
|                                                         |              | KDML105                               | 0.13 ± 0.01 aC (0%)   | 18.31 ± 4.3 bBC (-76%) | 35.92 ± 3.92 B (-63%)   | 82.10 ± 12.35 A (-45%)  | <i>p</i> > 0.01                       |
|                                                         | Heavy-saline | <sup>1</sup> Critical- <i>p</i> value | <i>p</i> > 0.05       | <i>p</i> > 0.05        | ns                      | ns                      |                                       |
|                                                         |              | mean                                  | 0.12 D                | 26.50 bC               | 46.04 bB                | 87.94 cA                | <i>p</i> > 0.01                       |
|                                                         |              | <sup>3</sup> Critical- <i>p</i> value | ns                    | <i>p</i> > 0.01        | <i>p</i> > 0.01         | <i>p</i> > 0.01         |                                       |

<sup>1</sup> Critical-*p* value for testing each trait among genotypes within growth stage (the same column). <sup>2</sup> Critical-*p* value for testing each trait among growth stages of each genotype (the same row) and

<sup>3</sup> critical-*p* value for testing each trait among salinity fields within growth stage. [Values in the brackets indicated percentage increase (+) or decrease (-) in the saline fields compared with that in the non-saline field]



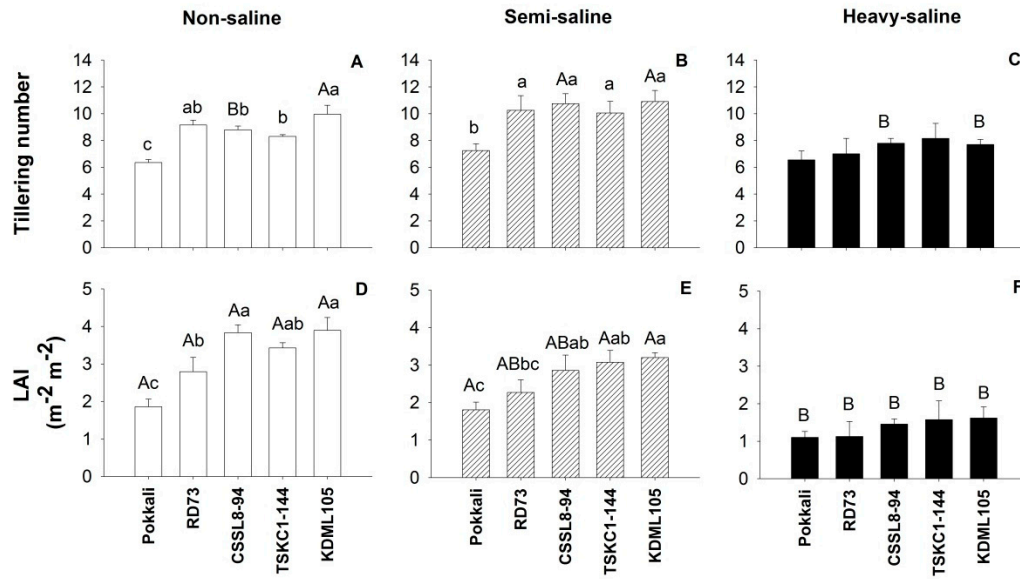

**Figure S1.** Tiller number and leaf area index (LAI) of five rice genotypes including Pokkali, RD73, CSSL8-94, TSKC1-144 and KDML105 after grew under non-saline (A,D), semi-saline (B,E) and heavy-saline fields (C,F) measured at mature stage. Means which are significantly different ( $p < 0.05$ ) among genotypes for each saline field are denoted by different lower-case letters. For each genotype means which are significantly different ( $p < 0.05$ ) among saline fields are denoted with capital letters. Data shows mean of four replicates  $\pm$  standard error (SE) ( $n=4$ ).

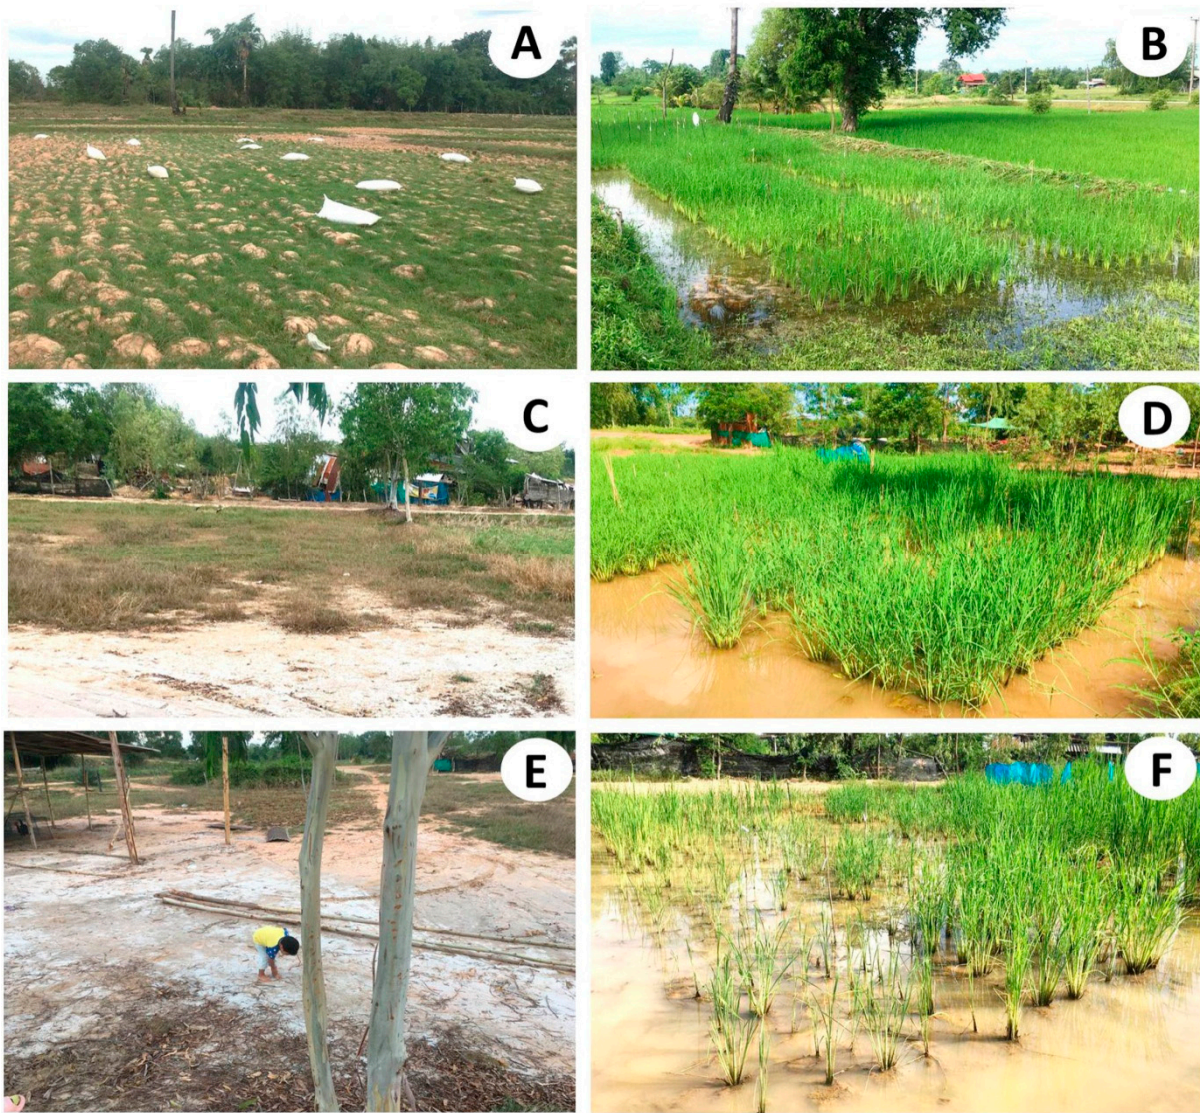

**Figure S2.** Experimental fields before land preparation; non-saline (A), semi-saline (C) and heavy-saline (E), and rice growing in the non-saline (B), semi-saline (D) and heavy-saline field (F). For the semi-saline and heavy-saline plots, farmers avoided growing rice in these areas for many years.
